# Supplementary material for: The relative influences of product volume, delivery format and alcohol concentration on dry-time and efficacy of alcohol-based hand rubs
Source: PubMed Central journal article supplement (PMC4180309; doi:10.1186/1471-2334-14-511), 2014-09-20

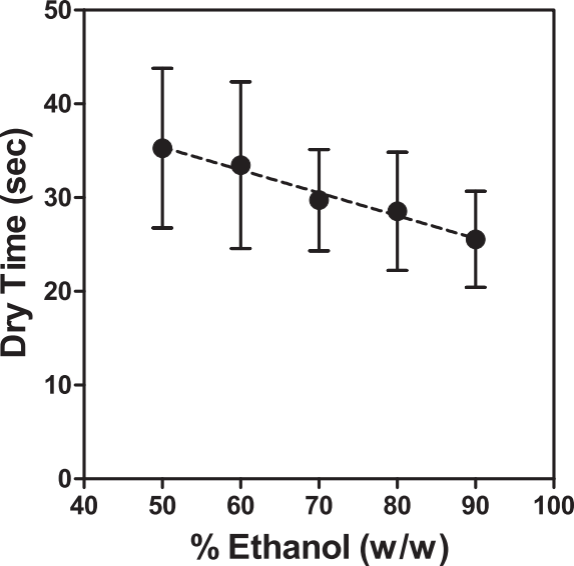

Supplement: 12879_2014_3830_MOESM2_ESM.pdf [file 12879_2014_3830_MOESM2_ESM.pdf]
